# Supplementary material
Source: Springer Nature journal article supplement (https://www.springermedizin.de/resource/supplementary/12885_2014_5135_MOESM10_ESM.pdf/9467904)
Supplement: MOESM10 [file 9467904]

Ovarian clear cell carcinoma  
Chromosome: 17q23-25 amplification 32 %

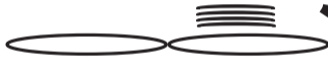

PPM1D: Overexpression

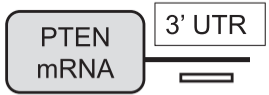

*miR-21* ↑ 25%

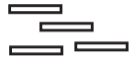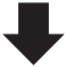

PTEN Protein ↓ 14 %

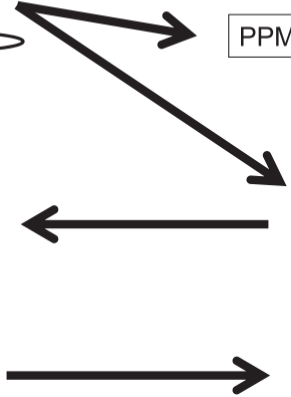

Cancer
